# Supplementary material for: Improving thermal conductivity and decreasing supercooling of paraffin phase change materials by n-octadecylamine-functionalized multi-walled carbon nanotubes
Source: Royal Society of Chemistry journal article supplement (doi:10.1039/c4ra04225e), 2014-01-01
Supplement: c4ra04225e1.pdf [file c4ra04225e1.pdf]

**Electronic Supplementary Information for**  
**Improving thermal conductivity and decreasing supercooling of**  
**paraffin phase change materials by *n*-octadecylamine-functionalized**  
**multi-walled carbon nanotubes**

Qianqiu Tang, Jun Sun, Shuangmin Yu and Gengchao Wang\*

*(Shanghai Key Laboratory of Advanced Polymeric Materials, Key Laboratory for Ultrafine Materials of Ministry of Education, School of Materials Science and Engineering, East China University of Science and Technology, Shanghai 200237, China)*

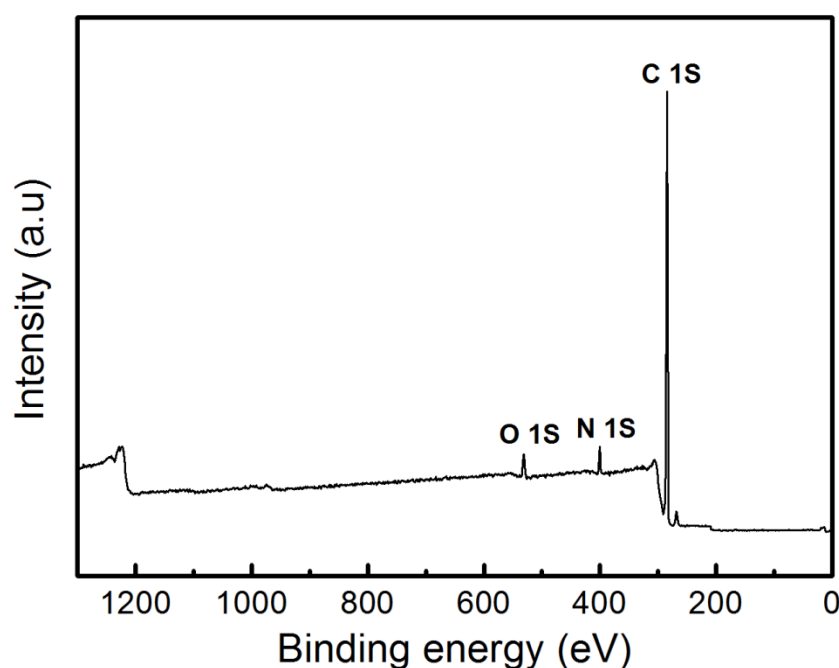

**Fig. S1** XPS spectrum of the *f*-MWCNTs.

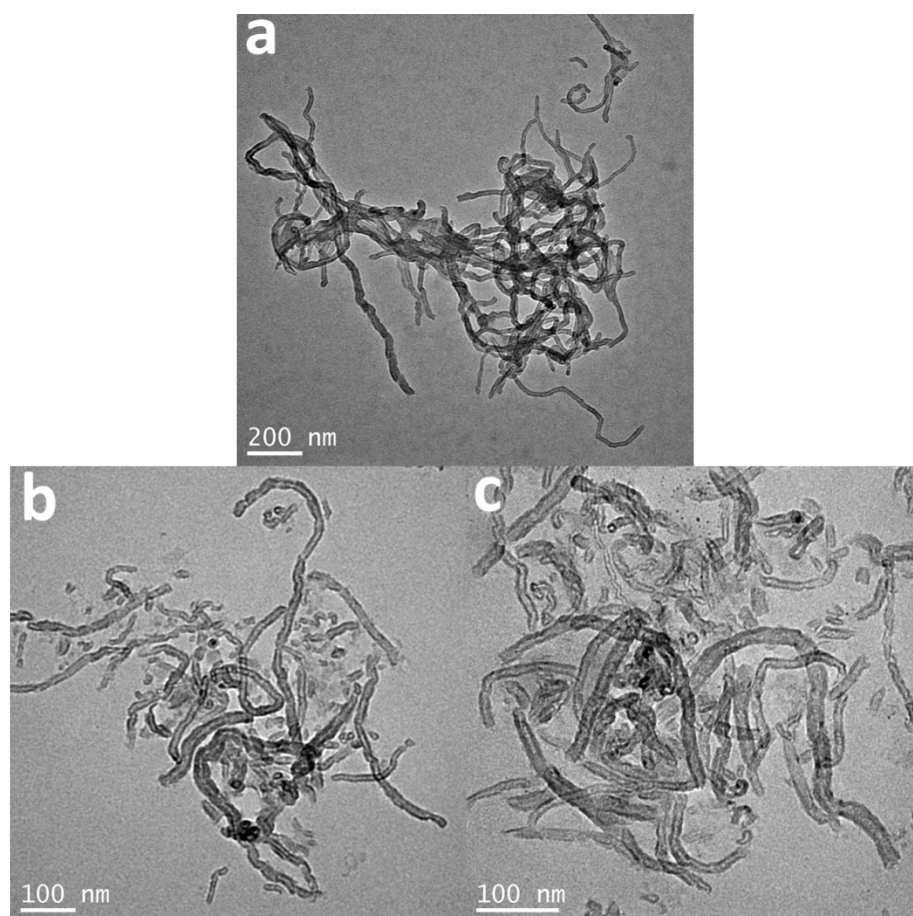

**Fig. S2** TEM images of (a) crude MWCNTs, (b)  $\alpha$ -MWCNTs, and (c)  $f$ -MWCNTs in toluene.
